# Supplementary material for: A carrier free photodynamic oxidizer for enhanced tumor therapy by redox homeostasis disruption
Source: Royal Society of Chemistry journal article supplement (doi:10.1039/d1bm01876k), 2022-01-01
Supplement: d1bm01876k1.pdf [file d1bm01876k1.pdf]

## **Electronic Supplementary Information (ESI)**

*of*

### **Carrier free photodynamic oxidizer for enhanced tumor therapy by redox homeostasis disruption**

*Ni Yang,<sup>†</sup> Rongrong Zheng,<sup>†</sup> Ziying Chen, Ruixin Wang, Linping Zhao, Xiayun Chen,*

*Lei Chen, Lin Xu, \* Shiyong Li\* and Ali Chen\**

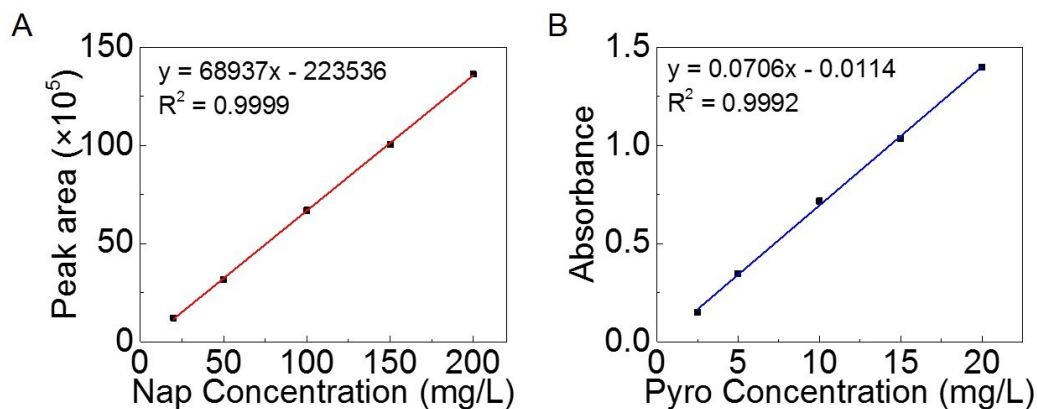

**Fig. S1.** Standard curves of (A) Nap and (B) Pyro by using HPLC and UV-vis spectrum.

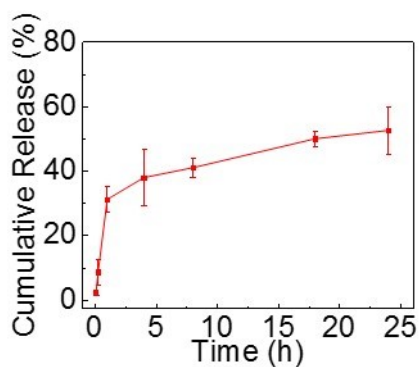

**Fig. S2.** Drug release curve of Pyro by detecting the fluorescence of released Pyro at scheduled time (n=2).

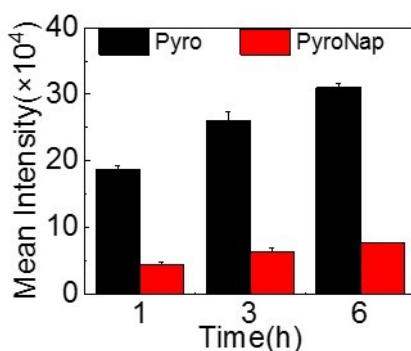

**Fig. S3.** Flow cytometry analysis of 4T1 cells after treatment with Pyro or PyroNap for 1, 3 and 6 h (n=3).

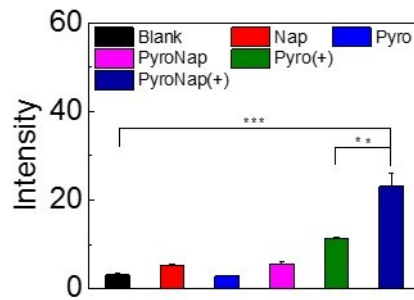

**Fig. S4.** The quantitative analysis of DCF fluorescence in 4T1 cells after treatment with Nap, Pyro, PyroNap in the presence or absence of light. \*\*P < 0.01 and \*\*\*P < 0.001 were tested *via* a student's t-test (n=3).

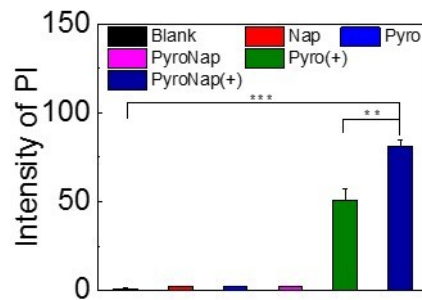

**Fig. S5.** The quantitative analysis of PI fluorescence in 4T1 cells after treatment with Nap, Pyro, PyroNap in the absence or presence of light. \*\*P < 0.01 and \*\*\*P < 0.001 were tested *via* a student's t-test (n=3).

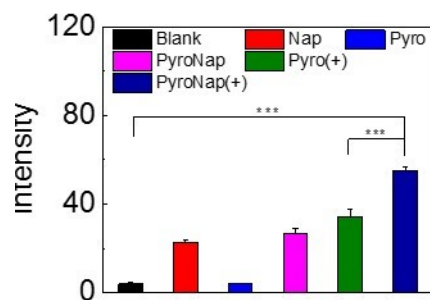

**Fig. S6.** The quantitative analysis of TUNEL immunofluorescence in 4T1 tumor tissues after treatment with Nap, Pyro, PyroNap in the absence or presence of light on the 14<sup>th</sup> day. \*\*\*P < 0.001 was tested *via* a student's t-test (n=3).
